# Supplementary material
Source: Springer Nature journal article supplement (https://www.springermedizin.de/resource/supplementary/13054_2009_8299_MOESM6_ESM.pdf/9731654)

**(a)**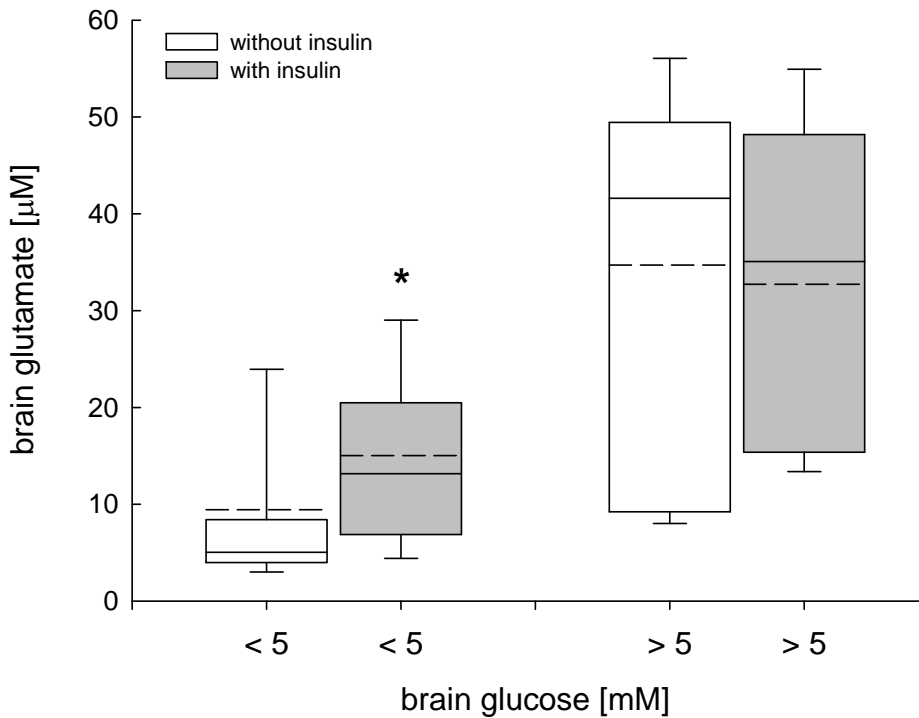**(b)**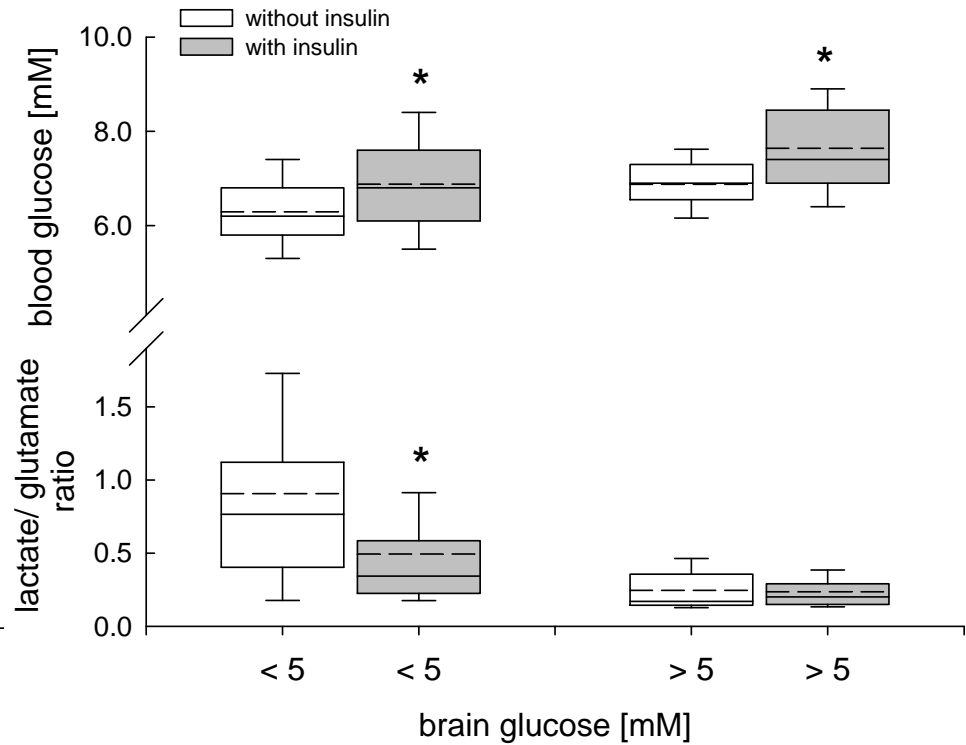

Supplement: MOESM6 [file 9731654]
